# Supplementary material for: Novel thermoresponsive polymer outperforming Pluronic® F127
Source: Research Square preprint supplement (doi:10.21203/rs.3.rs-104434/v1), 2020-11-18
Supplement: Supplementary file 1 [file 8a5be2ac017a055f323a0545.docx]

**Novel thermoresponsive polymer outperforming Pluronic® F127**

Anna P. Constantinou1, Valeria Nele1,2,3, James J. Doutch4, Roman V. Moiseev5, Vitaliy V. Khutoryanskiy5, Molly M. Stevens1,2,3,6, Theoni K. Georgiou*,1

**Supporting Information**

**Fig. S1:** Normalised GPC traces proving the successful synthesis of PEGMA11-*b*-BuMA20-*b*-DEGMA11: i) PEGMA11 homopolymer in blue dashed line, ii) PEGMA11-*b*-BuMA20 diblock copolymer in orange dotted line, iii) PEGMA11-*b*-BuMA20-*b*-DEGMA11 triblock terpolymer before precipitation in green solid line, and iv) the final triblock terpolymer after precipitation in black dashed line, respectively. *Note: the degrees of polymerisation (DPs) correspond to the targeted values.*

**Fig. S2**: 1H NMR spectra of PEGMA11-*b*-BuMA20-*b*-DEGMA11 and its linear precursors: (a) PEGMA11 homopolymer in blue, (b) PEGMA11-*b*-BuMA20 diblock copolymer in orange, and (c) PEGMA11-*b*-BuMA20-*b*-DEGMA11 triblock terpolymer in green, respectively. The polymer structures of each step are also presented, in which the PEGMA, BuMA, and DEGMA units are coloured in blue, orange and green, respectively. *Note: the degrees of polymerisation (DPs) correspond to the targeted values.*

| **Theoretical Structure a** | **MMtheor. b**  **(gmol-1)** | ***M*n c**  **(gmol-1)** | ***Ð* c** | **PEGMA-BuMA-DEGMA (w/w%)** | |
| --- | --- | --- | --- | --- | --- |
| **Theoretical** | **1H NMR** |
| PEGMA11 | 3380 | 4200 | 1.14 | 100-00-00 | 100-00-00 |
| PEGMA11-*b*-BuMA20 | 6250 | 7700 | 1.16 | 53-47-00 | 55-45-00 |
| PEGMA11-*b*-BuMA20-*b*-DEGMA11 | 8300 | 10000 | 1.19 | 40-35-25 | 41-34-25 |
| 11600 * | 1.18 * |

**Table S1:** Theoretical polymer structure, molar mass (MM) and composition, and experimental molar mass/ number-average molar mass (*M*n), molar mass distributions (*Ð*) and compositions.

a PEGMA, BuMA, DEGMA and PMA are the abbreviations for penta(ethylene glycol) methyl ether methacrylate, *n*-butyl methacrylate, di(ethylene glycol) methyl ether methacrylate and propargyl methacrylate, respectively.

b The theoretical MM has been calculated by the following equation: ; where DP stands for degree of polymerisation and 100 gmol-1 is the MM of the part of the initiator that stays on the polymer chain.

c The number-average MM (*M*n) and the dispersity indices have resulted by gel permeation chromatography (GPC) analysis. The calibration is based on six MMA standard samples of the following MM values: 2, 4, 8, 20, 50, 100 kDa.

* The results correspond to the GPC analysis after precipitation.

**Fig. S3:** Phase diagrams in deionised water of a) Pluronic® F127 and b) PEGMAx-*b*-BuMAy-*b*-DEGMAz. The different transitions are symbolised as follows: i) runny solution phase in white (square, triangle and circle correspond to clear, slightly cloudy and cloudy states, respectively), ii) viscous solution phase in orange (triangle and circle correspond to transparent and cloudy states, respectively), iii) stable gel phase in blue (triangle and circle correspond to transparent and cloudy gels, respectively, and iv) two-phases in green (rhombus and square correspond to gel syneresis and precipitation, respectively). The gelation area is approximately shown in black dashed line.

**Fig. S4:** a) Experimental setup for measuring the injection rate and b) dependence of the injection rate (mL/min) of the solutions of PEGMAx-*b*-BuMAy-*b*-DEGMAz (in blue) and Pluronic® F127 (in green) at 15 w/w% in PBS on the size of the needle. The injection rate was measured by using two different weights: i) 200 g (2 N) shown in squares and ii) 500 g (4.9 N) shown in triangles.

**Fig. S5:** DSC thermograms of 15 w/w% polymer solutions in phosphate buffered saline (PBS); a) Pluronic® F127 and b) PEGMAx-*b*-BuMAy-*b*-DEGMAz. The first, second, and third runs of each batch of polymer solution are shown in dotted, dashed and solid lines, respectively.

| **Polymer Structure a** | **Diameter (nm)** | | | | | | | |
| --- | --- | --- | --- | --- | --- | --- | --- | --- |
| **Solvent** | **Temp. (°C)** | ***d*H b** | | | | | **PDI** |
| **By Intensity** | | | **By Number** | |
| **1st** | **2nd** | **3rd** |
| PEGMA11-*b*-BuMA20-*b*-DEGMA11 | PBS | 10 | ---- | **32.9** | 174.0 | 27.9 | | 0.168 |
| 25 | 10.8 | **27.9** | 174.0 | 10.0 | **23.6** | 0.164 |
| D2O/PBS | 25 | ---- | **28.2** | 342.0 | 21.0 | | 0.192 |
| EG99-*b*-PG66-*b*-EG99 | PBS | 10 | **8.8** | ---- | 342.0 | 6.5 | | 0.144 |
| 25 | 6.5 | **28.2** | ---- | 5.6 | | 0.276 |
| D2O/PBS | 25 | **4.9** | 24.4 | 712.0 | 4.2 | | 0.211 |

**Table S2:** Polymer structure, experimental hydrodynamic diameters (*d*H) and polydispersity indices as resulted by dynamic light scattering (DLS) in phosphate buffered saline (PBS) at both 10°C and 25°C, and in deuterated PBS (D2O/PBS) at 25°C).

a PEGMA, BuMA, and DEGMA stand for penta(ethylene glycol) methyl ether methacrylate, *n*-butyl methacrylate, and di(ethylene glycol) methyl ether methacrylate, respectively. EG and PG stand for ethylene glycol and propylene glycol, respectively.

b The results presented are the diameter which corresponds to the maximum of the peak by intensity and by number; where more than one peaks are present, the value of highest intensity is shown in bold.

**Figure S6:** DLS histograms of the solutions of PEGMAx-*b*-BuMAy-*b*-DEGMAz at 1 w/w% at different conditions.

**Figure S7:** DLS histograms of the solutions of Pluronic® F127 at 1 w/w% in different conditions.

**Figure S8.1:** SANS data, generated during a Rheo-SANS experiment, of the solutions of PEGMAx-*b*-BuMAy-*b*-DEGMAz at 15 w/w% in deuterated phosphate buffered saline (D2O/PBS) at different temperatures (23°C to 35°C). The data points along with their errors are presented in blue, whereas the fit lines, generated by using an Elliptical Cylinder model with hardsphere in SasView software, are shown in black. *Note:* *Data are plotted in a log-log scale.*

**Figure S8.2:** SANS data, generated during a Rheo-SANS experiment, of the solutions of PEGMAx-*b*-BuMAy-*b*-DEGMAz at 15 w/w% in deuterated phosphate buffered saline (D2O/PBS) at different temperatures (36°C to 43°C). The data points along with their errors are presented in blue, whereas the fit lines, generated by using an Elliptical Cylinder model with hardsphere in SasView software, are shown in black. *Note:* *Data are plotted in a log-log scale.*

**Figure S8.3:** SANS data, generated during a Rheo-SANS experiment, of the solutions of PEGMAx-*b*-BuMAy-*b*-DEGMAz at 15 w/w% in deuterated phosphate buffered saline (D2O/PBS) at different temperatures (45°C to 55°C). The data points along with their errors are presented in blue, whereas the fit lines, generated by using a Broad Peak model in SasView software, are shown in black. *Note:* *Data are plotted in a log-log scale.*

**Figure S9.1:** SANS data, generated during a Rheo-SANS experiment, of the solutions of Pluronic® F127 at 15 w/w% in deuterated phosphate buffered saline (D2O/PBS) at different temperatures (23°C to 36°C). The data points along with their errors are presented in blue, whereas the fit lines, generated by using the IGOR software, are shown in black. *Note:* *Data are plotted in a log-log scale.*

**Figure S9.2:** SANS data, generated during a Rheo-SANS experiment, of the solutions of Pluronic® F127 at 15 w/w% in deuterated phosphate buffered saline (D2O/PBS) at different temperatures (39°C to 47°C). The data points along with their errors are presented in blue, whereas the fit lines, generated by using the IGOR software, are shown in black. *Note:* *Data are plotted in a log-log scale.*

**Figure S10:** SANSdata, generated during a Rheo-SANS experiment, on 15 w/w% solutions in deuterated phosphate buffered saline (D2O/PBS) of a) PEGMAx-*b*-BuMAy-*b*-DEGMAz and b) Pluronic® F127, at different temperatures. The data points along with their errors, and their fit lines at different temperatures are presented in: i) black for 23°C (starting temperature), ii) orange for 37°C (body temperature), iii) blue for 45°C, and iv) green for 55°C for our polymer only. The fit lines were generated by using: i) an Elliptical Cylinder model in SasView software for PEGMAx-*b*-BuMAy-*b*-DEGMAz at 23°C and 37°C, ii) a Broad Peak model in SasView software for PEGMAx-*b*-BuMAy-*b*-DEGMAz at 45°C and 55°C, iii) IGOR software for Pluronic® F127 at 23°C, 37°C, and 45°C. *Note:* *Data are plotted in a log-log scale.*

**Figure S11:** Phase diagrams in deuterated phosphate buffered saline (D2O/PBS) of a) PEGMAx-*b*-BuMAy-*b*-DEGMAz and b) Pluronic® F127. The different transitions are symbolised as follows: i) runny solution phase in white (square, triangle and circle correspond to clear, slightly cloudy and cloudy states, respectively), ii) viscous solution phase in orange (triangle and circle correspond to transparent and cloudy states, respectively), iii) stable gel phase in blue (triangle and circle correspond to transparent and cloudy gels, respectively, and iv) two-phases in green (rhombus and square correspond to gel syneresis and precipitation, respectively). The gelation area is approximately shown in black dashed line.

**Figure S12:** The fitting parameters of the self-assembled structure adopted by PEGMAx-*b*-BuMAy-*b*-DEGMAz as a function of temperature are presented: i) radius axis ratio and ii) volume fraction.

**Figure S13:** Rheological measurements on PEGMAx-*b*-BuMAy-*b*-DEGMAz in deuterated phosphate buffered saline (D2O/PBS) at 15 w/w% at 37°C: (a) amplitude-sweep measurement – storage modulus, G′, in blue, and loss modulus, G″, in grey, and (b) frequency-sweep measurement – storage modulus, G′, in blue, and loss modulus, G″, in grey.
